# Supplementary material for: High Expression of VSTM2L Induced Resistance to Chemoradiotherapy in Rectal Cancer through Downstream IL-4 Signaling
Source: Hindawi journal article supplement (doi:10.1155/2021/6657012), 2021-01-08
Supplement: f1 [file 6657012.f1.pdf]

## Supplementary. Figure.

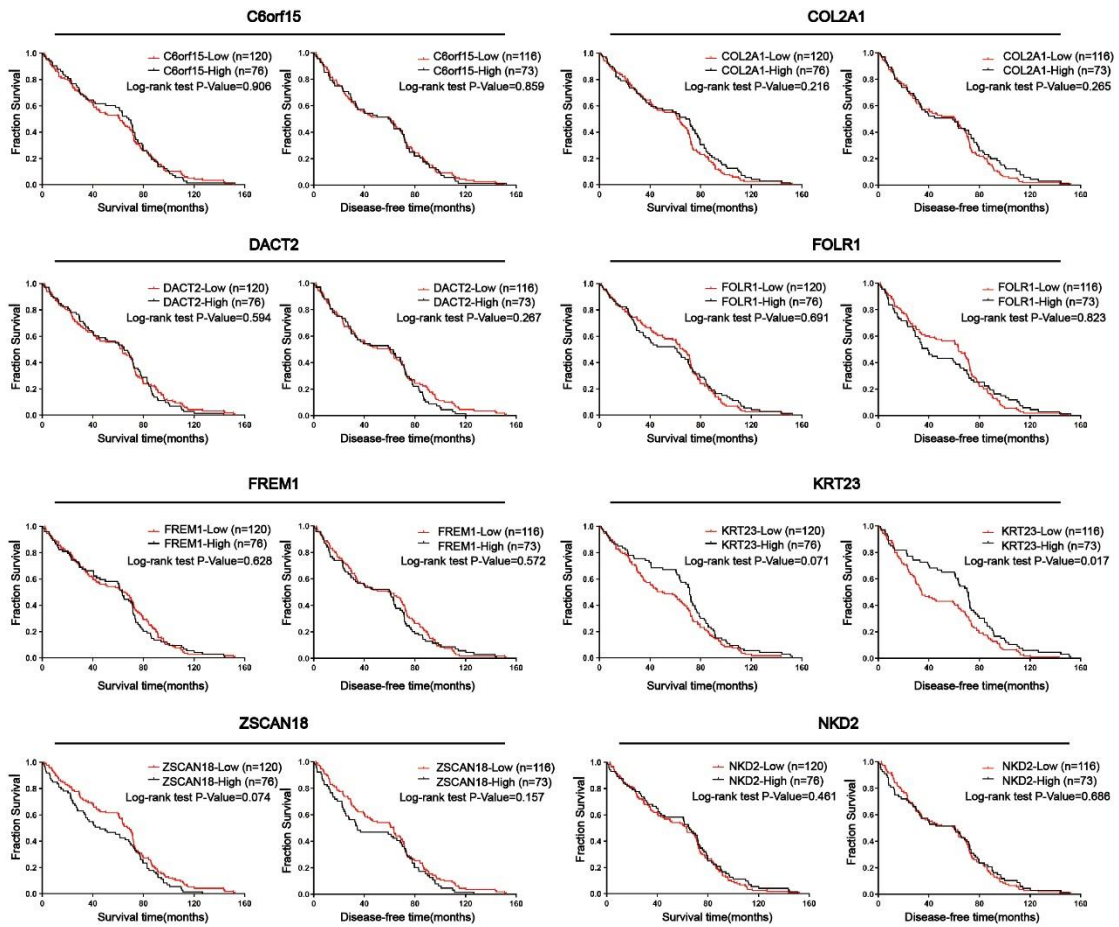

## Supplementary Figure Legend

VSTM2L was chosen as a significantly prognostic biomarker in patients with rectal cancer receiving pCRT from 9 candidate genes. Kaplan-Meier survival curves of patients in GSE87211 demonstrate the prognostic impact of up-regulated significantly gene expression, including C6orf15, KRT23, COL2A1, FOLR1, FREM1, DACT2, NKD2, ZSCAN18 on survival time and disease-free time except for VSTM2L gene.

**Supplementary Table.S1** Information of primer sequences and primary antibody

| Primer Sequences for Quantitate real-time PCR |                                        |
|-----------------------------------------------|----------------------------------------|
| VSTM2L-Forward                                | 5'-GATCCAGTGGTGGTATGTACGG-3'           |
| VSTM2L-Reverse                                | 5'-ACACTTATTTTGGTTGCCTCCTTC-3'         |
| GAPDH--Forward                                | 5'-ATTCCACCCATGGCAAATTCC-3'            |
| GAPDH--Reverse                                | 5'-GACTCCACGACGTACTCAGC -3'            |
| Primary Antibody for Western-Blotting         |                                        |
| VSTM2L                                        | 1:500, 25457-1-AP, Proteintech Group   |
| CFLAR                                         | 1:1000,10394-1-AP, Proteintech Group   |
| ALOX5                                         | 1:500, 10021-1-Ig, Proteintech Group   |
| PMAIP1                                        | 1:1000, NB600-1159, Novus Biologicals  |
| EGR1                                          | 1:1000, 55117-1-AP, Proteintech Group  |
| NCF2                                          | 1:500, 15551-1-AP, Proteintech Group   |
| SLC39A8                                       | 1:1000, 20459-1-AP, Proteintech Group  |
| PEG10                                         | 1:1000, 14412-1-AP, Proteintech Group  |
| GAPDH                                         | 1:5000, 60004-1- Ig, Proteintech Group |
